# Supplementary material
Source: publisher figshare collection journal article supplement (https://gsajournals.figshare.com/ndownloader/files/15255116)
Supplement: Supplementary file 1 [file 15255116]

## Sheet: Sheet1
Table S2: Classification of the 'Juriah' and 'Parel' LTR retrotransposons
SequenceID	RTDomainCladeID	Superfamily	ClosestElementInMIPS	NameInMIPS	match region	Status
Juriah	tat	Gypsy	RLG_2894|Pennisetum	juriah_311G2-1	entire element	Previously described
Parel1	del	Gypsy	RLG_40192|Zea	LTR_AC186622.3_14040	internal region fragments	New element
1 Classified as a new element; the name 'Parel' was assigned in this study
